# Supplementary material
Source: publisher figshare collection journal article supplement (https://gsajournals.figshare.com/articles/dataset/_/6870110)
Supplement: Supplementary file 1 [file 1]

## SUPPLEMENTARY MATERIALS

Santantonio, N., Jannink, J., Sorrells, M. 2018. Prediction of sub-genome additive and interaction effects in allohexaploid wheat. G3.

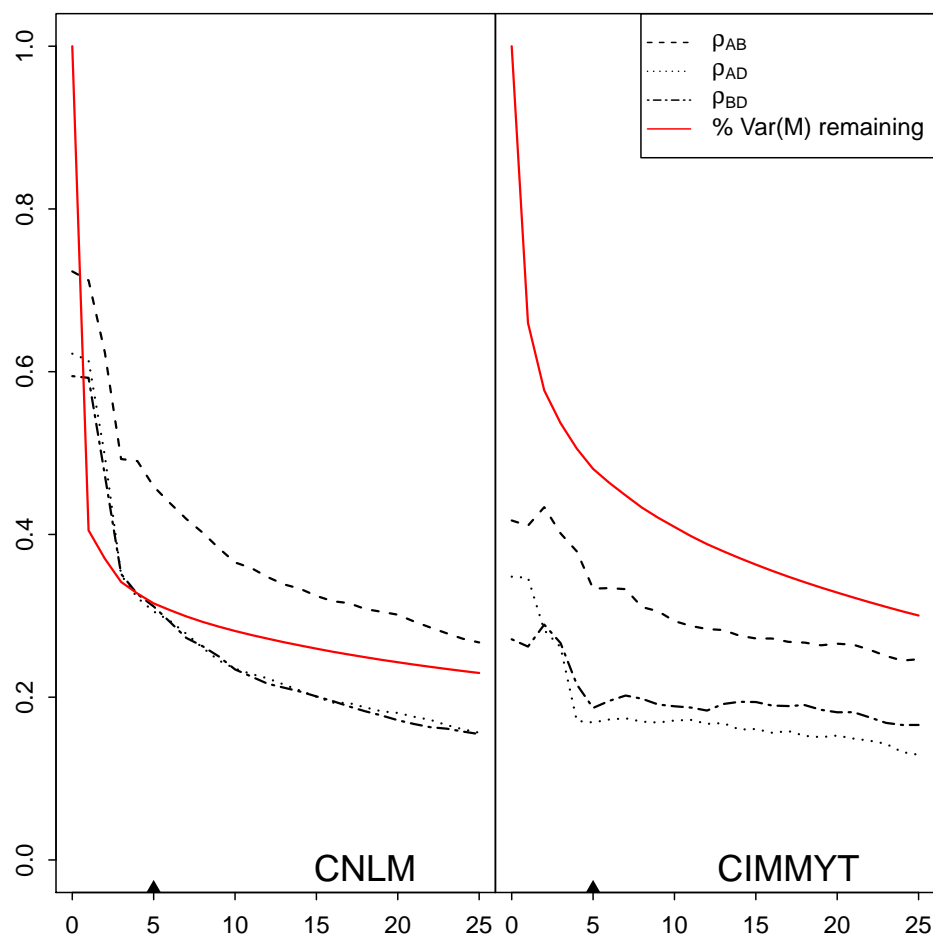

**Figure S1** Correlation coefficient,  $\rho$ , of off-diagonal elements of estimated additive covariance matrices  $\mathbf{K}_A$ ,  $\mathbf{K}_B$  and  $\mathbf{K}_D$ . The percent genotype marker variance remaining in the marker matrix after removing  $k$  dimensions is shown in red. The chosen population structure dimension  $k = 5$ , is indicated by a  $\blacktriangle$ .

■ **Table S1** Table of model fit statistics for whole genome and subgenome genomic prediction models in the CNLM population.

| Model              | Terms             | GY (0.30)                               | PH (0.73)     | TW (0.53)     | HD (0.79)     |
|--------------------|-------------------|-----------------------------------------|---------------|---------------|---------------|
| G (2) <sup>a</sup> | log $\mathcal{L}$ | -48                                     | 2237          | 1547          | 6343          |
|                    | parameters        | 28                                      | 26            | 28            | 27            |
|                    | AIC               | 153                                     | -4423         | -3037         | -12631        |
|                    | G                 | 0.268 <sup>b</sup> (12.59) <sup>c</sup> | 3.823 (20.75) | 1.067 (16.66) | 3.900 (21.16) |
|                    | R                 | 0.324 (61.86) <sup>d</sup>              | 0.135 (56.17) | 0.200 (60.12) | 0.054 (58.76) |
| ABD (4)            | log $\mathcal{L}$ | -48                                     | 2242          | 1549          | 6366          |
|                    | parameters        | 30                                      | 28            | 30            | 29            |
|                    | AIC               | 155                                     | -4428         | -3037         | -12673        |
|                    | A                 | 0.098 (5.86)                            | 1.280 (8.41)  | 0.503 (8.24)  | 0.907 (7.41)  |
|                    | B                 | 0.153 (6.88)                            | 1.585 (8.7)   | 0.380 (7.10)  | 1.534 (9.04)  |
|                    | D                 | 0.021 (2.47)                            | 0.892 (6.24)  | 0.181 (4.38)  | 1.387 (8.03)  |
|                    | R                 | 0.324 (61.87)                           | 0.135 (56.16) | 0.199 (60.12) | 0.054 (58.75) |
| G×G (5)            | log $\mathcal{L}$ | -43                                     | 2360          | 1630          | 6432          |
|                    | parameters        | 29                                      | 27            | 29            | 28            |
|                    | AIC               | 144                                     | -4665         | -3203         | -12808        |
|                    | G                 | 0.203 (7.86)                            | 0.889 (6.46)  | 0.194 (4.47)  | 1.121 (7.30)  |
|                    | H                 | 0.018 (3.04)                            | 0.478 (11.95) | 0.184 (11.33) | 0.451 (11.13) |
|                    | R                 | 0.322 (61.39)                           | 0.132 (56.50) | 0.195 (60.25) | 0.053 (58.98) |
| ABD×ABD (7)        | log $\mathcal{L}$ | -41                                     | 2375          | 1634          | 6451          |
|                    | parameters        | 33                                      | 31            | 33            | 32            |
|                    | AIC               | 149                                     | -4687         | -3201         | -12839        |
|                    | A                 | 0.076 (4.66)                            | 0.292 (3.7)   | 0.079 (2.79)  | 0.104 (1.71)  |
|                    | B                 | 0.119 (5.40)                            | 0.429 (4.21)  | 0.114 (3.44)  | 0.587 (5.38)  |
|                    | D                 | 0.015 (1.95)                            | 0.279 (3.31)  | 0.007 (0.50)  | 0.664 (5.26)  |
|                    | AB                | 0.005 (0.49)                            | 0.007 (0.11)  | 0.073 (2.38)  | 0.223 (3.29)  |
|                    | AD                | 0.012 (1.36)                            | 0.276 (4.16)  | 0.073 (2.51)  | 0.167 (2.49)  |
|                    | BD                | 0.000                                   | 0.149 (2.19)  | 0.034 (1.15)  | 0.005 (0.08)  |
|                    | R                 | 0.322 (61.40)                           | 0.132 (56.51) | 0.195 (60.26) | 0.053 (58.98) |

<sup>a</sup> Equation

<sup>b</sup> Variance component estimates reported for additive main effects (G, A, B and D) and epistatic interactions (H, A×B, A×D, B×D) are the ratios of the actual variance component to the residual variance component for ease of comparison.

<sup>c</sup> The variance component divided by their respective standard errors are shown in parentheses.

<sup>d</sup> The residual variance components are the actual estimates from the centered and scaled data (refer to Table ?? for scaling coefficients) with their associated standard errors in parentheses.

■ **Table S2** Table of model fit statistics for whole genome and subgenome genomic prediction models in the W-GY population.

| Model              | Terms              | E1                                     | E2            | E3            | E4            |
|--------------------|--------------------|----------------------------------------|---------------|---------------|---------------|
| G (2) <sup>a</sup> | $\log \mathcal{L}$ | -243                                   | -243          | -264          | -248          |
|                    | parameters         | 2                                      | 2             | 2             | 2             |
|                    | AIC                | 489                                    | 490           | 533           | 500           |
|                    | G                  | 0.550 <sup>b</sup> (5.47) <sup>c</sup> | 0.456 (5.10)  | 0.295 (4.23)  | 0.369 (4.69)  |
|                    | R                  | 0.541 (11.88) <sup>d</sup>             | 0.568 (12.17) | 0.669 (12.73) | 0.606 (12.5)  |
| ABD (4)            | $\log \mathcal{L}$ | -242                                   | -242          | -264          | -247          |
|                    | parameters         | 4                                      | 4             | 4             | 4             |
|                    | AIC                | 492                                    | 492           | 536           | 503           |
|                    | A                  | 0.241 (3.38)                           | 0.090 (1.90)  | 0.062 (1.66)  | 0.097 (2.10)  |
|                    | B                  | 0.215 (2.88)                           | 0.267 (3.48)  | 0.222 (3.23)  | 0.188 (2.89)  |
|                    | D                  | 0.067 (1.72)                           | 0.093 (1.92)  | 0.022 (0.93)  | 0.064 (1.86)  |
|                    | R                  | 0.547 (11.97)                          | 0.571 (12.28) | 0.668 (12.79) | 0.613 (12.59) |
| G×G (5)            | $\log \mathcal{L}$ | -222                                   | -242          | -249          | -233          |
|                    | parameters         | 3                                      | 3             | 3             | 3             |
|                    | AIC                | 451                                    | 491           | 504           | 472           |
|                    | G                  | 0.426 (3.25)                           | 0.440 (4.39)  | 0.303 (2.73)  | 0.314 (3.04)  |
|                    | H                  | 0.272 (4.59)                           | 0.033 (1.02)  | 0.325 (4.81)  | 0.231 (4.34)  |
|                    | R                  | 0.343 (7.31)                           | 0.532 (9.34)  | 0.368 (6.61)  | 0.391 (7.68)  |
| ABD×ABD (7)        | $\log \mathcal{L}$ | -222                                   | -241          | -247          | -232          |
|                    | parameters         | 7                                      | 7             | 7             | 7             |
|                    | AIC                | 458                                    | 495           | 509           | 478           |
|                    | A                  | 0.124 (1.56)                           | 0.070 (1.52)  | 0.061 (1.15)  | 0.080 (1.47)  |
|                    | B                  | 0.269 (2.43)                           | 0.273 (3.25)  | 0.239 (2.23)  | 0.138 (1.79)  |
|                    | D                  | 0.070 (1.26)                           | 0.093 (1.81)  | 0.041 (0.94)  | 0.087 (1.74)  |
|                    | AB                 | 0.219 (3.39)                           | 0.04 (1.33)   | 0.215 (2.69)  | 0.167 (2.88)  |
|                    | AD                 | 0.029 (0.62)                           | 0.000         | 0.097 (1.52)  | 0.007 (0.14)  |
|                    | BD                 | 0.000                                  | 0.000         | 0.000         | 0.027 (0.57)  |
|                    | R                  | 0.349 (7.38)                           | 0.526 (9.57)  | 0.366 (6.74)  | 0.409 (7.92)  |

<sup>a</sup> Equation

<sup>b</sup> Variance component estimates reported for additive main effects (G, A, B and D) and epistatic interactions (H, A×B, A×D, B×D) are the ratios of the actual variance component to the residual variance component for ease of comparison.

<sup>c</sup> The variance component divided by their respective standard errors are shown in parentheses.

<sup>d</sup> The residual variance components are the actual estimates from the centered and scaled data (refer to [Crossa et al. \(2010\)](#) for scaling coefficients).

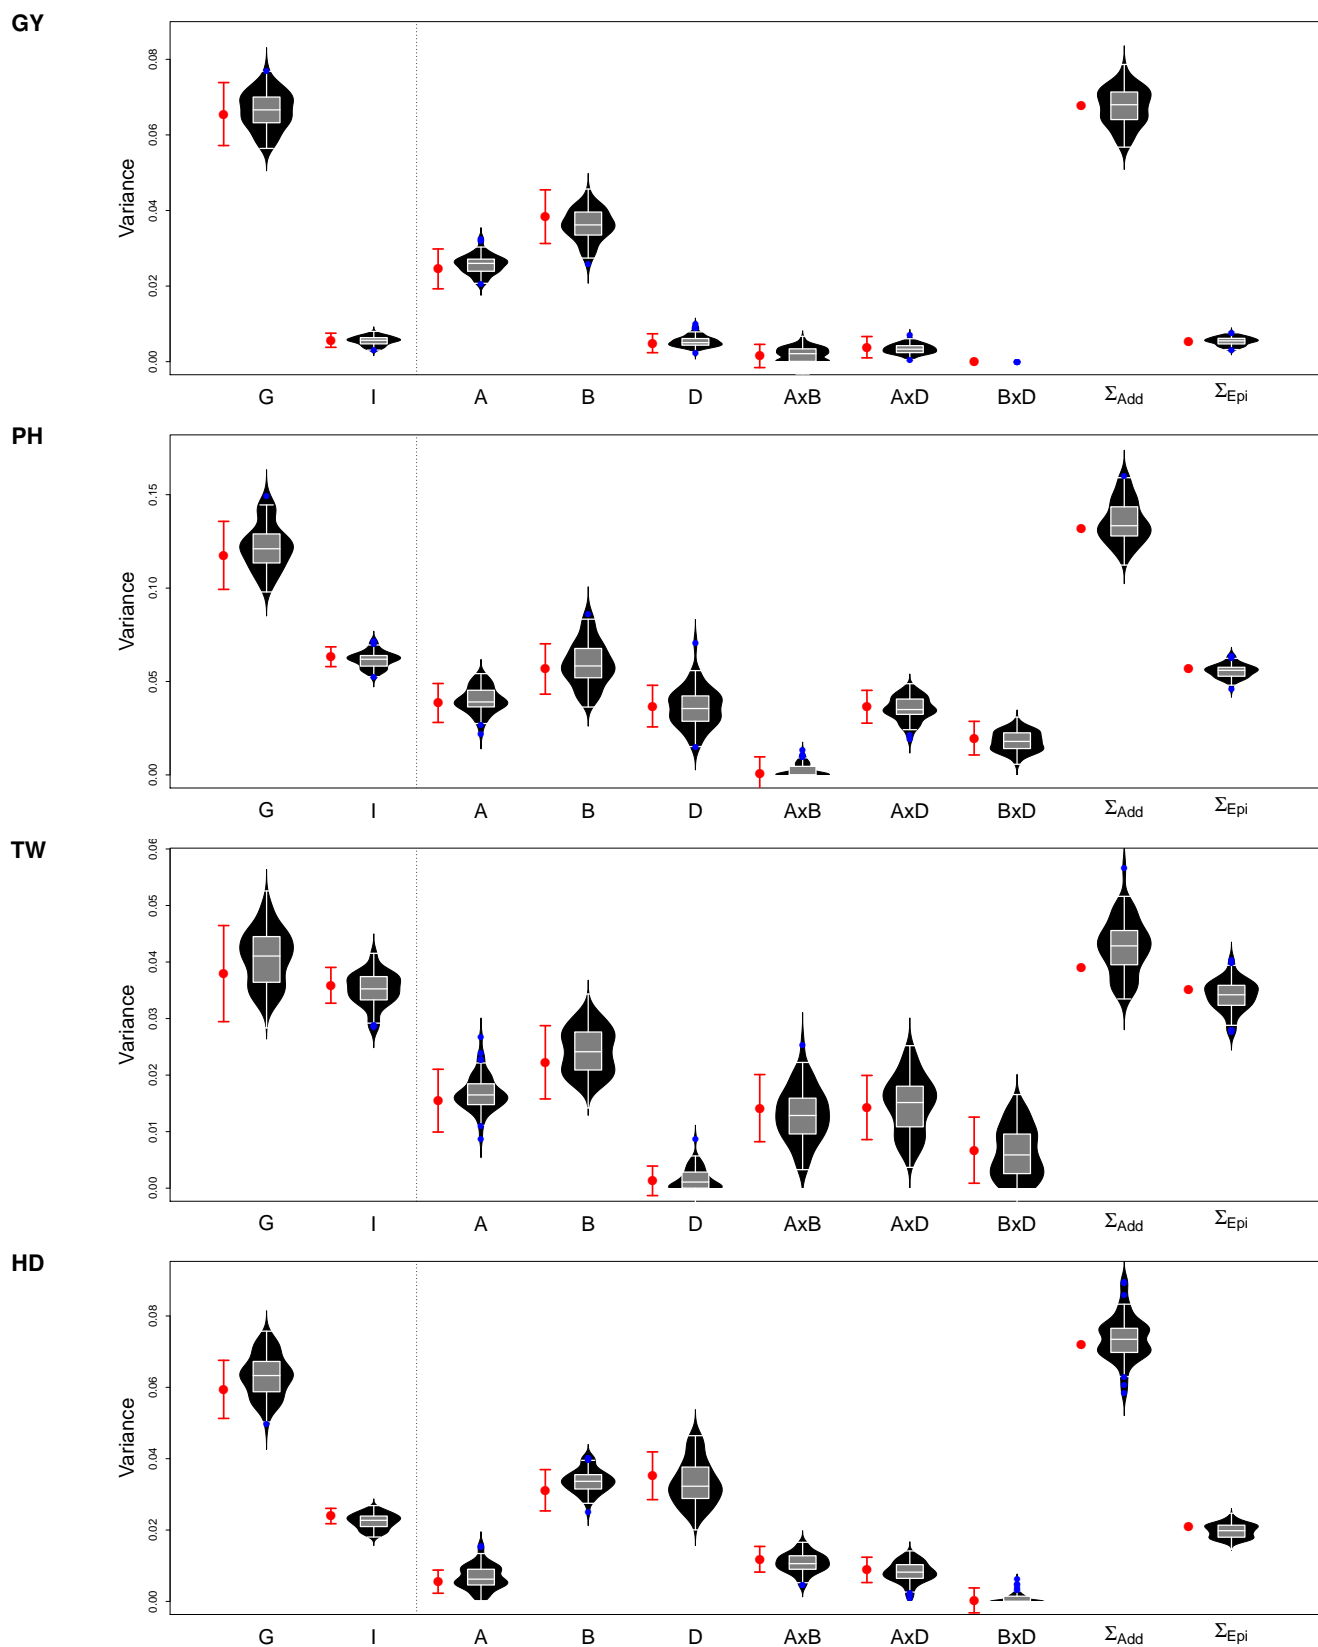

**Figure S2** Estimates and standard errors of variance components for four traits in the CNLM populations from the full model (red) compared to the sampling distribution of variance component estimates from the cross-validation scheme (black violins). G×G (5) and ABD×ABD (7) models are shown to the left and right of the dotted line, respectively. The sum of the additive ( $\Sigma_{Add}$ ) and epistatic ( $\Sigma_{Epi}$ ) variance components is also shown for the ABD×ABD model.

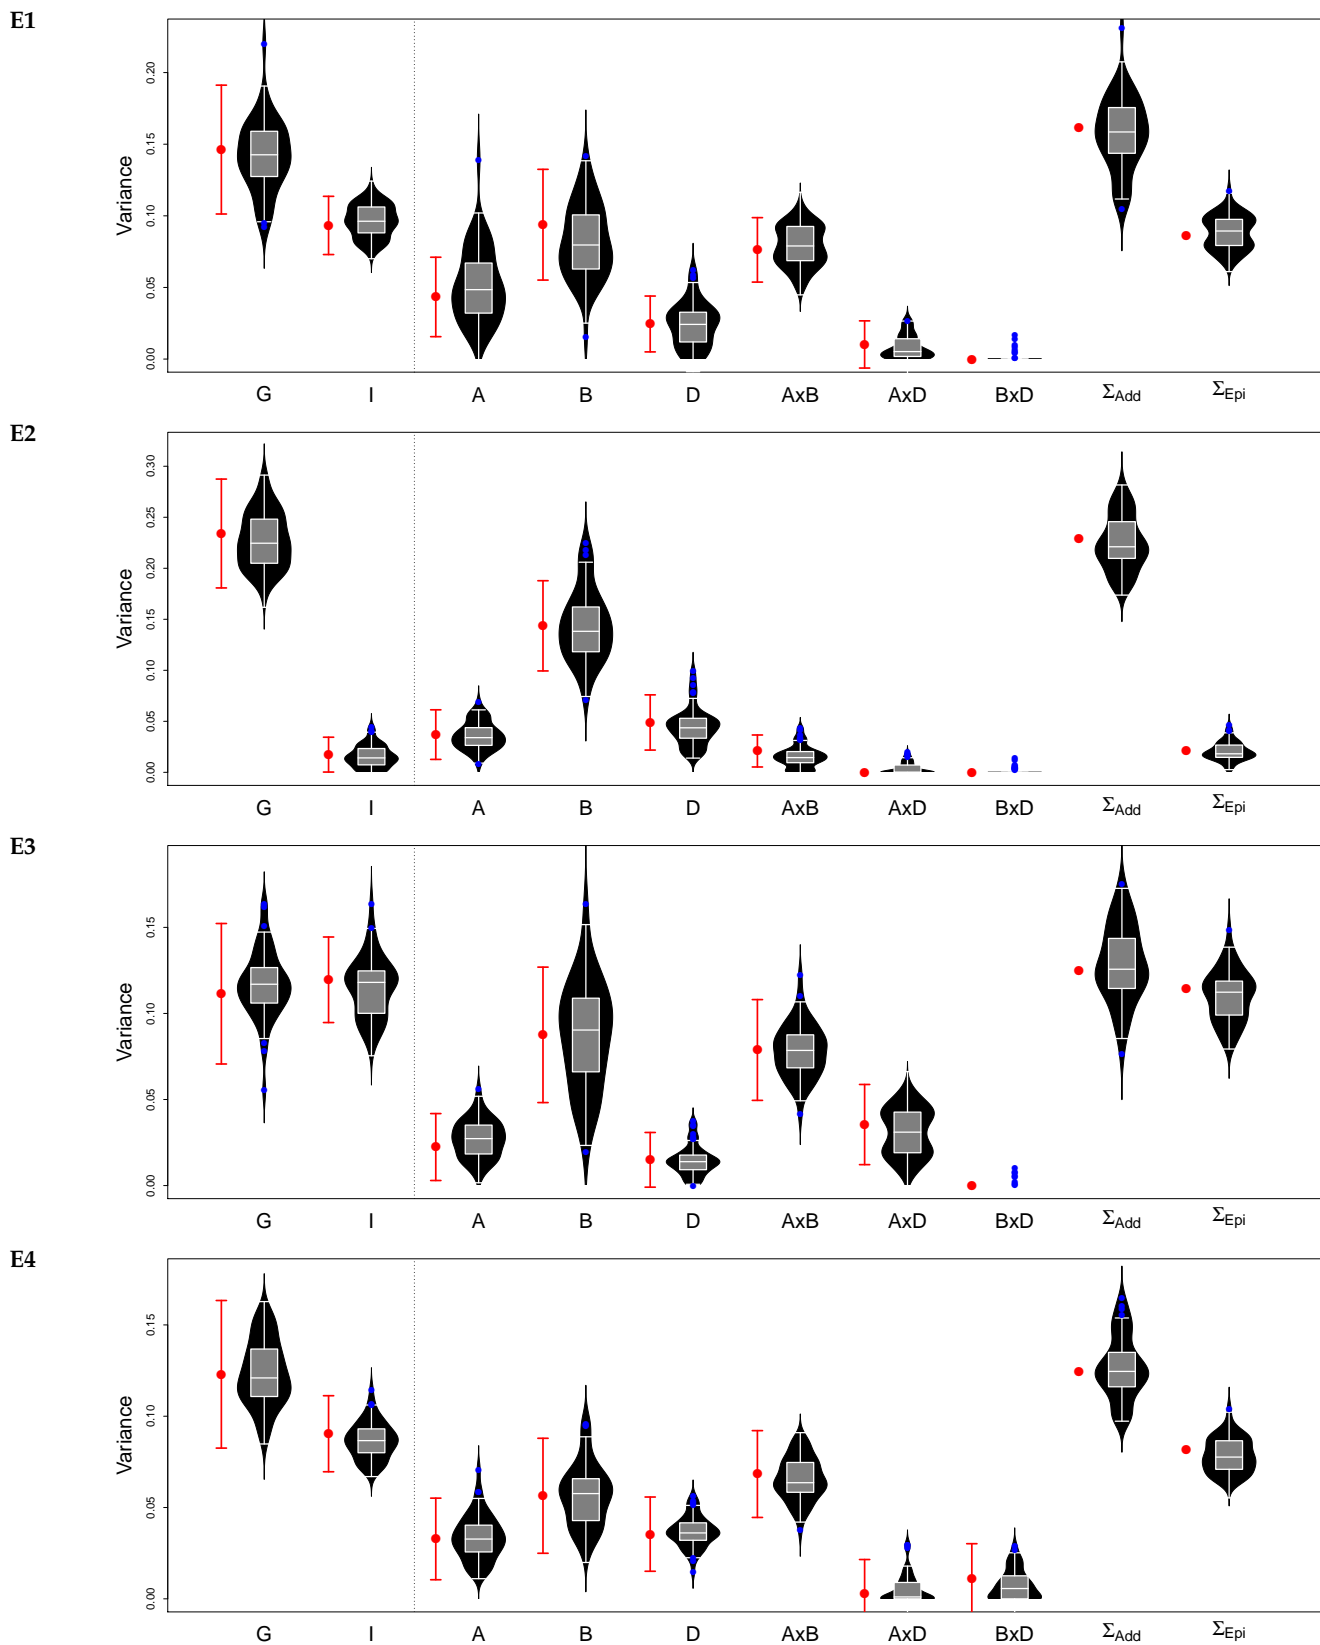

**Figure S3** Estimates and standard errors of variance components for four traits in the W-GY populations from the full model (red) compared to the sampling distribution of variance component estimates from the cross-validation scheme (black violins).  $G \times G$  (5) and  $ABD \times ABD$  (7) models are shown to the left and right of the dotted line, respectively. The sum of the additive ( $\Sigma_{Add}$ ) and epistatic ( $\Sigma_{Epi}$ ) variance components is also shown for the  $ABD \times ABD$  model.

■ **Table S3** Correlation of whole genome and subgenome additive effects in the CNLM population from models G (2) and ABD (4). Correlations of additive random effects without correcting for population structure are shown above the diagonal, while correlations of effects correcting for populations structure using the first  $k = 5$  PCs is shown below the diagonal.

|   | GY   |      |      |      | PH   |      |      |      | TW   |      |      |      | HD   |      |      |      |
|---|------|------|------|------|------|------|------|------|------|------|------|------|------|------|------|------|
|   | G    | A    | B    | D    | G    | A    | B    | D    | G    | A    | B    | D    | G    | A    | B    | D    |
| G |      | 0.80 | 0.82 | 0.48 |      | 0.74 | 0.68 | 0.60 |      | 0.78 | 0.74 | 0.50 |      | 0.60 | 0.74 | 0.70 |
| A | 0.75 |      | 0.36 | 0.22 | 0.73 |      | 0.15 | 0.25 | 0.75 |      | 0.26 | 0.25 | 0.60 |      | 0.20 | 0.14 |
| B | 0.83 | 0.31 |      | 0.31 | 0.70 | 0.19 |      | 0.17 | 0.73 | 0.20 |      | 0.13 | 0.71 | 0.18 |      | 0.26 |
| D | 0.46 | 0.18 | 0.26 |      | 0.59 | 0.23 | 0.14 |      | 0.49 | 0.23 | 0.12 |      | 0.65 | 0.14 | 0.14 |      |

■ **Table S4** Correlation of whole genome and subgenome additive effects in the W-GY population from models G (2) and ABD (4). Correlations of additive random effects without correcting for population structure are shown above the diagonal, while correlations of effects correcting for populations structure using the first  $k = 5$  PCs is shown below the diagonal.

|   | E1   |      |      |      | E2   |      |      |      | E3   |      |      |      | E4   |      |      |      |
|---|------|------|------|------|------|------|------|------|------|------|------|------|------|------|------|------|
|   | G    | A    | B    | D    | G    | A    | B    | D    | G    | A    | B    | D    | G    | A    | B    | D    |
| G |      | 0.83 | 0.80 | 0.51 |      | 0.69 | 0.84 | 0.57 |      | 0.68 | 0.90 | 0.50 |      | 0.73 | 0.80 | 0.52 |
| A | 0.83 |      | 0.41 | 0.28 | 0.65 |      | 0.31 | 0.25 | 0.74 |      | 0.36 | 0.07 | 0.63 |      | 0.34 | 0.09 |
| B | 0.79 | 0.39 |      | 0.20 | 0.91 | 0.39 |      | 0.27 | 0.91 | 0.45 |      | 0.37 | 0.86 | 0.33 |      | 0.21 |
| D | 0.57 | 0.36 | 0.24 |      | 0.57 | 0.22 | 0.32 |      | 0.48 | 0.28 | 0.25 |      | 0.63 | 0.22 | 0.30 |      |

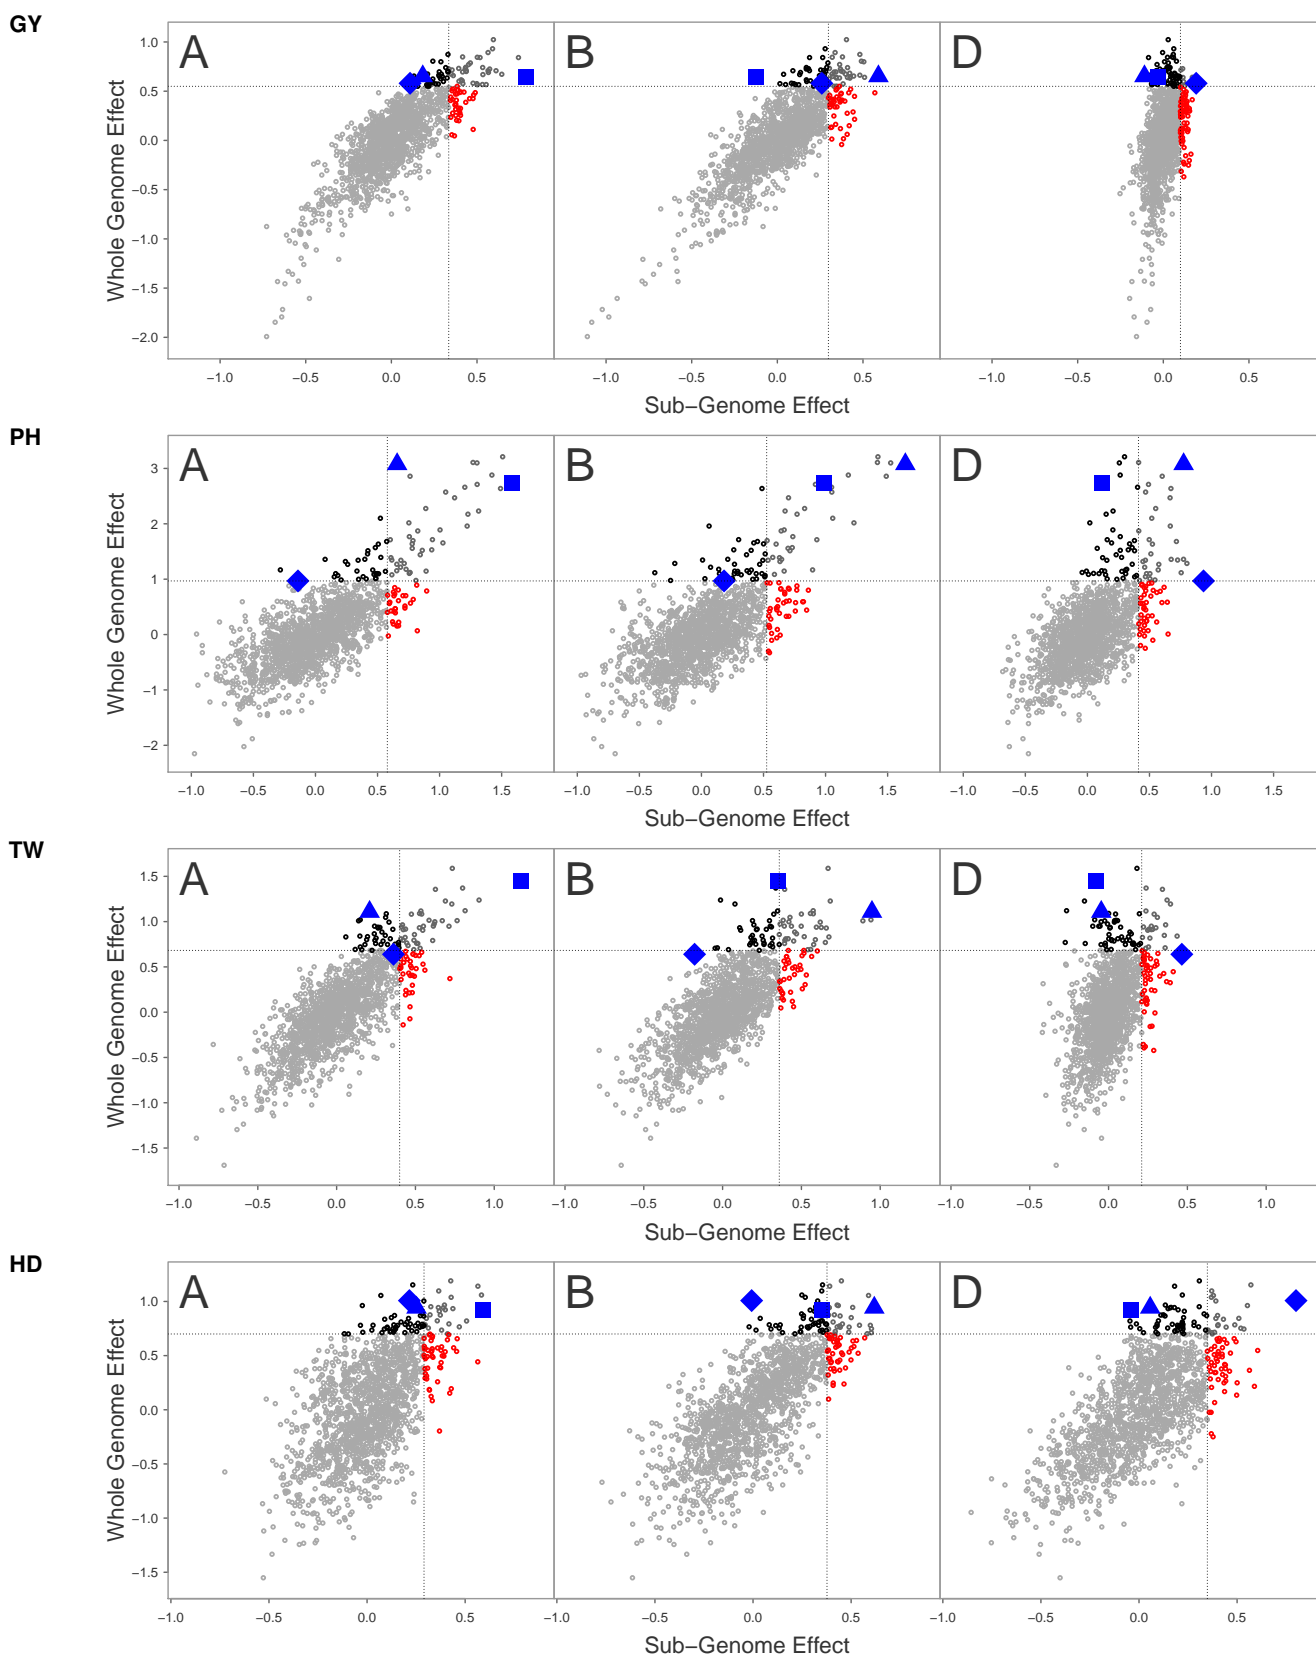

**Figure S4** Plot of whole genome additive effects (GEBV) by subgenome additive effects (SGEBV) for four traits in the CNLM populations. The dotted line indicates the 95% quantiles for whole or subgenome effects. Blue squares, triangles and diamonds indicate the line with the highest SGEV for each of the A, B and D subgenomes, respectively.

E1

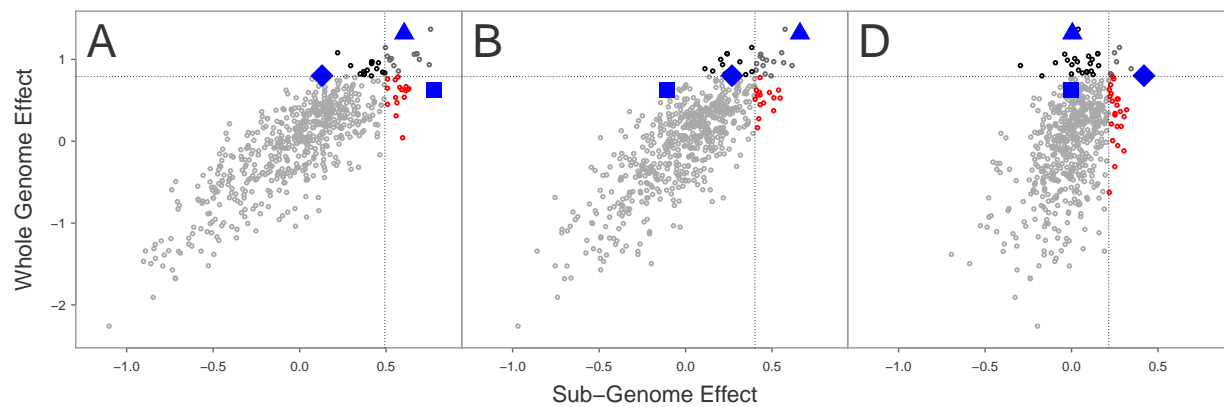

E2

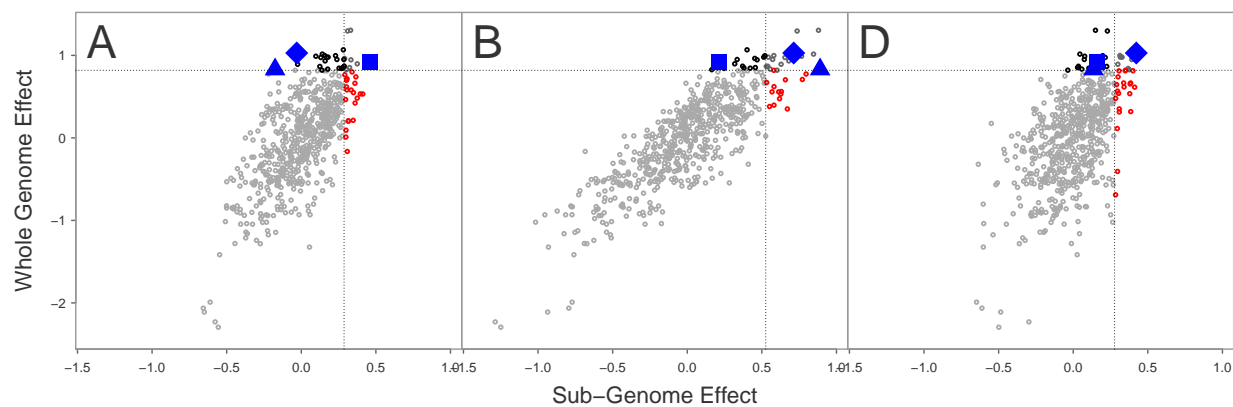

E3

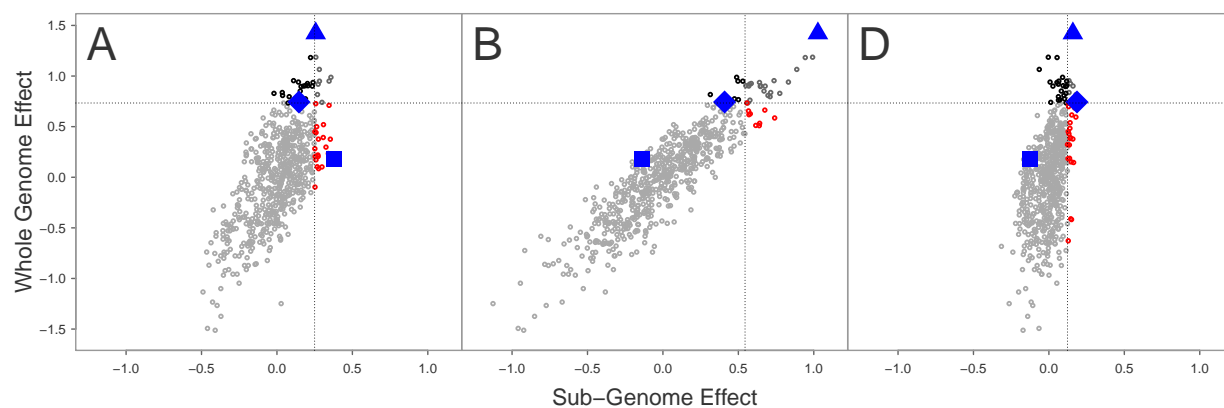

E4

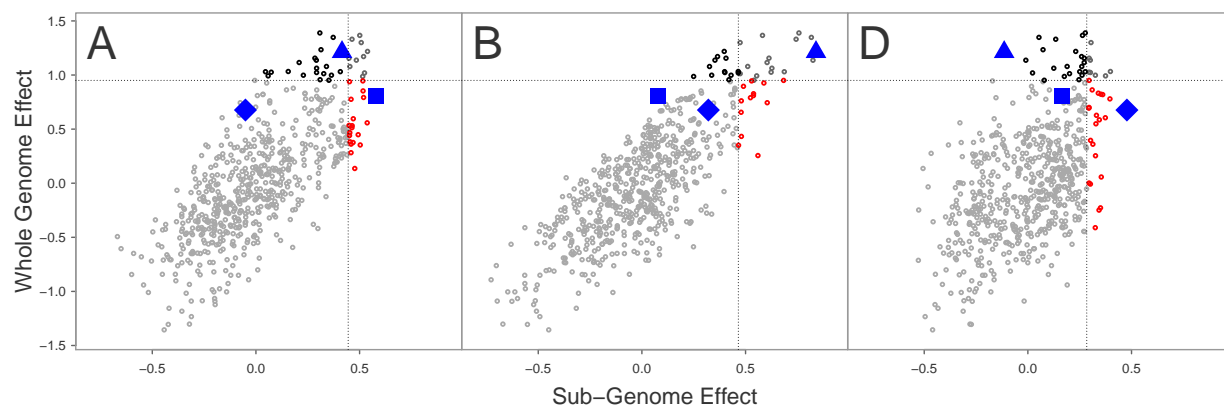

**Figure S5** Plot of whole genome additive effects (GEBV) by subgenome additive effects (SGEBV) for four traits in the W-GY populations. The dotted line indicates the 95% quantiles for whole or subgenome effects. Blue squares, triangles and diamonds indicate the line with the highest SGEV for each of the A, B and D subgenomes, respectively.



**Figure S6** Plot of the first two principal components of the additive covariance matrix **K** in the CNLM and W-GY populations.

CNLM

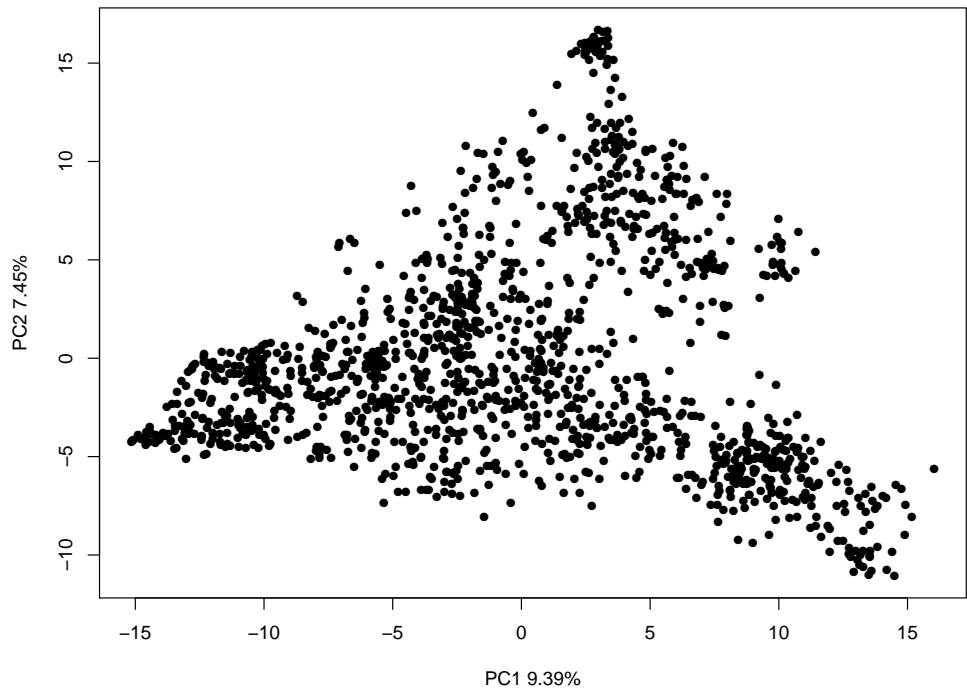

W-GY

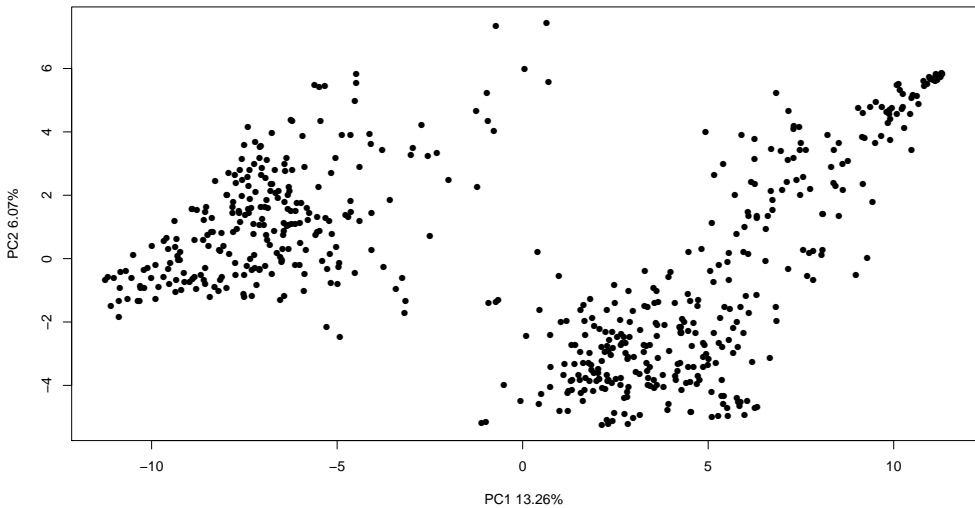

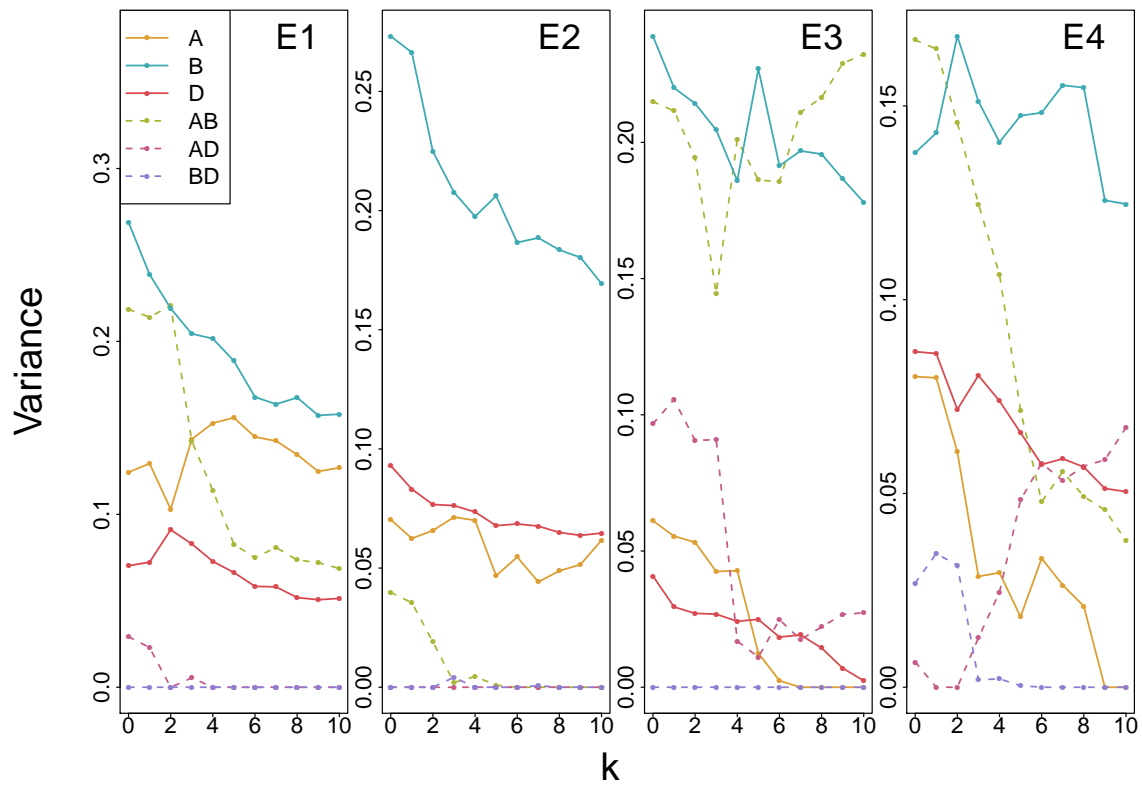

**Figure S7** Subgenome additive and interaction variance parameter estimates from the ABD $\times$ ABD model correcting for population structure with  $k \in \{0, 1, \dots, 10\}$  principal components as fixed effects. Models were fit with four traits for the W-GY population.

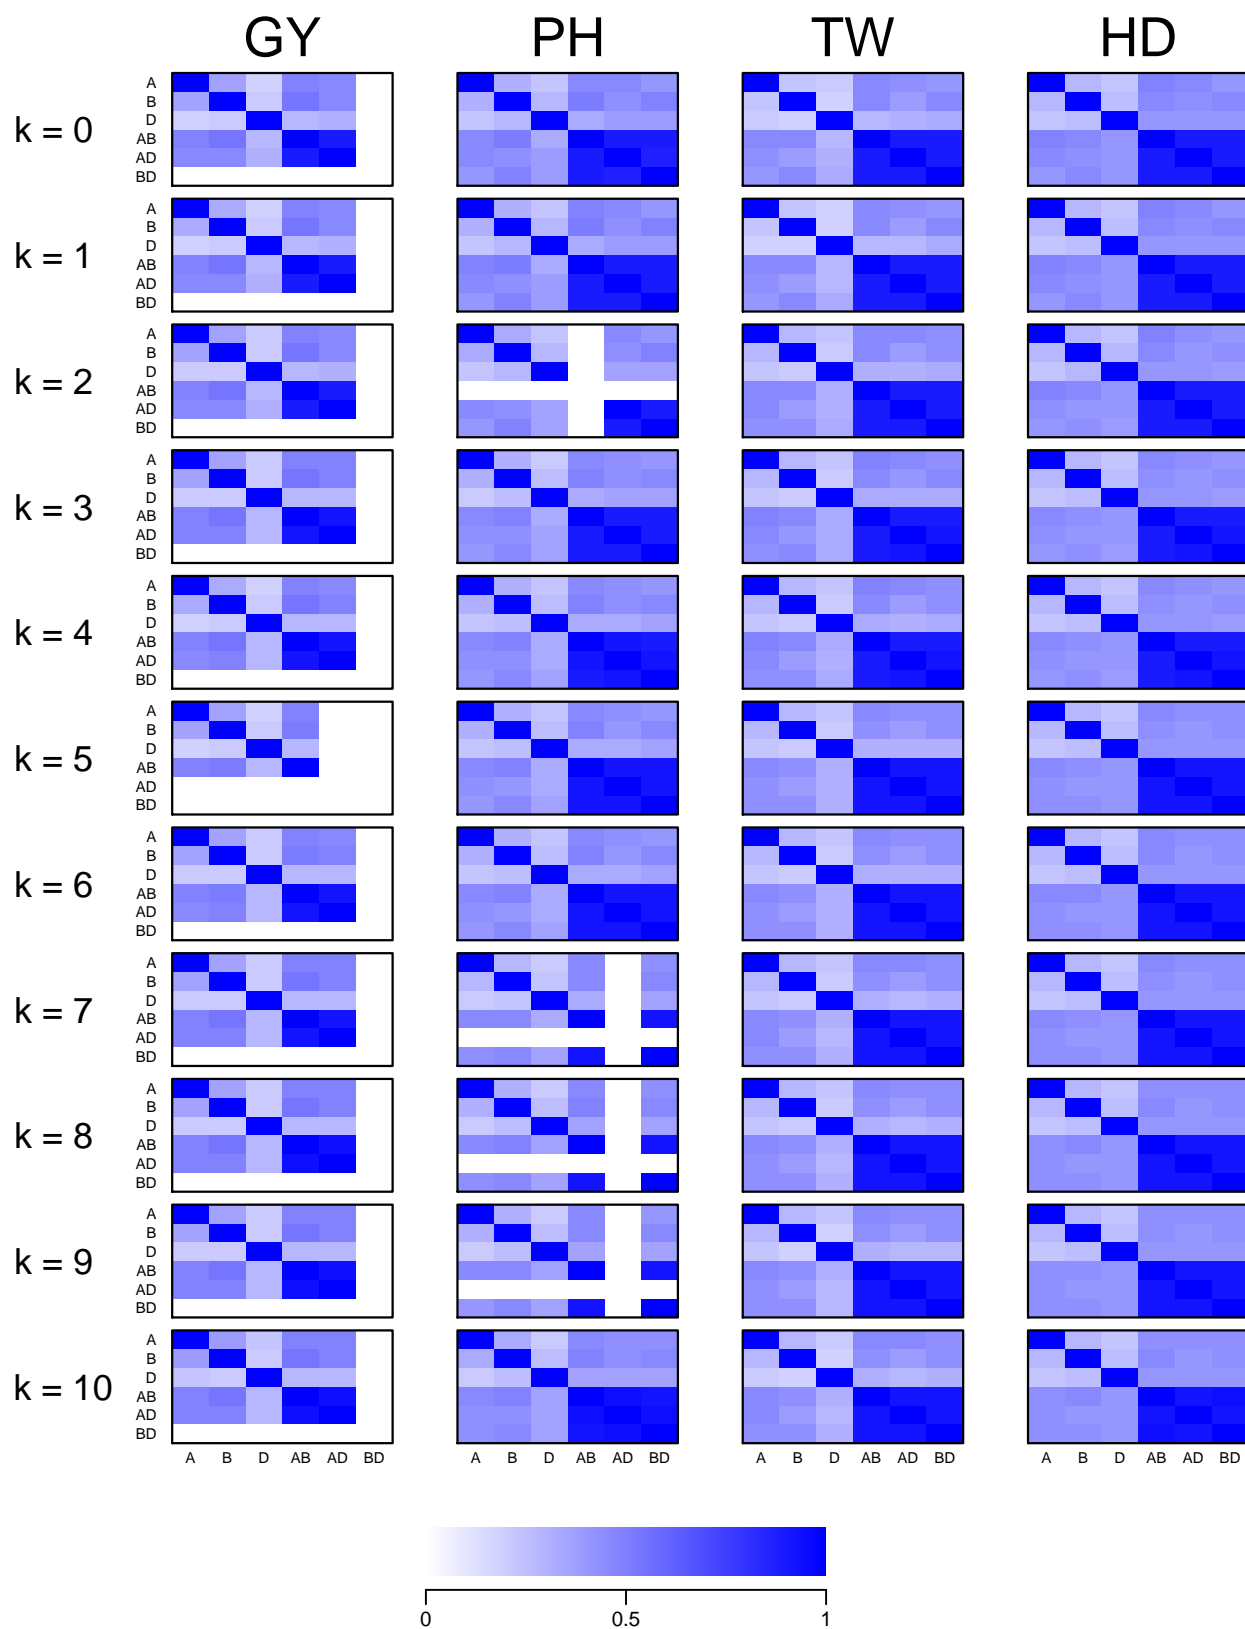

**Figure S8** Correlation of variance component estimates derived from the average information from the model fit for models correcting for population structure with  $k \in \{0, 1, \dots, 10\}$  principal components for four traits in the CNLM population.

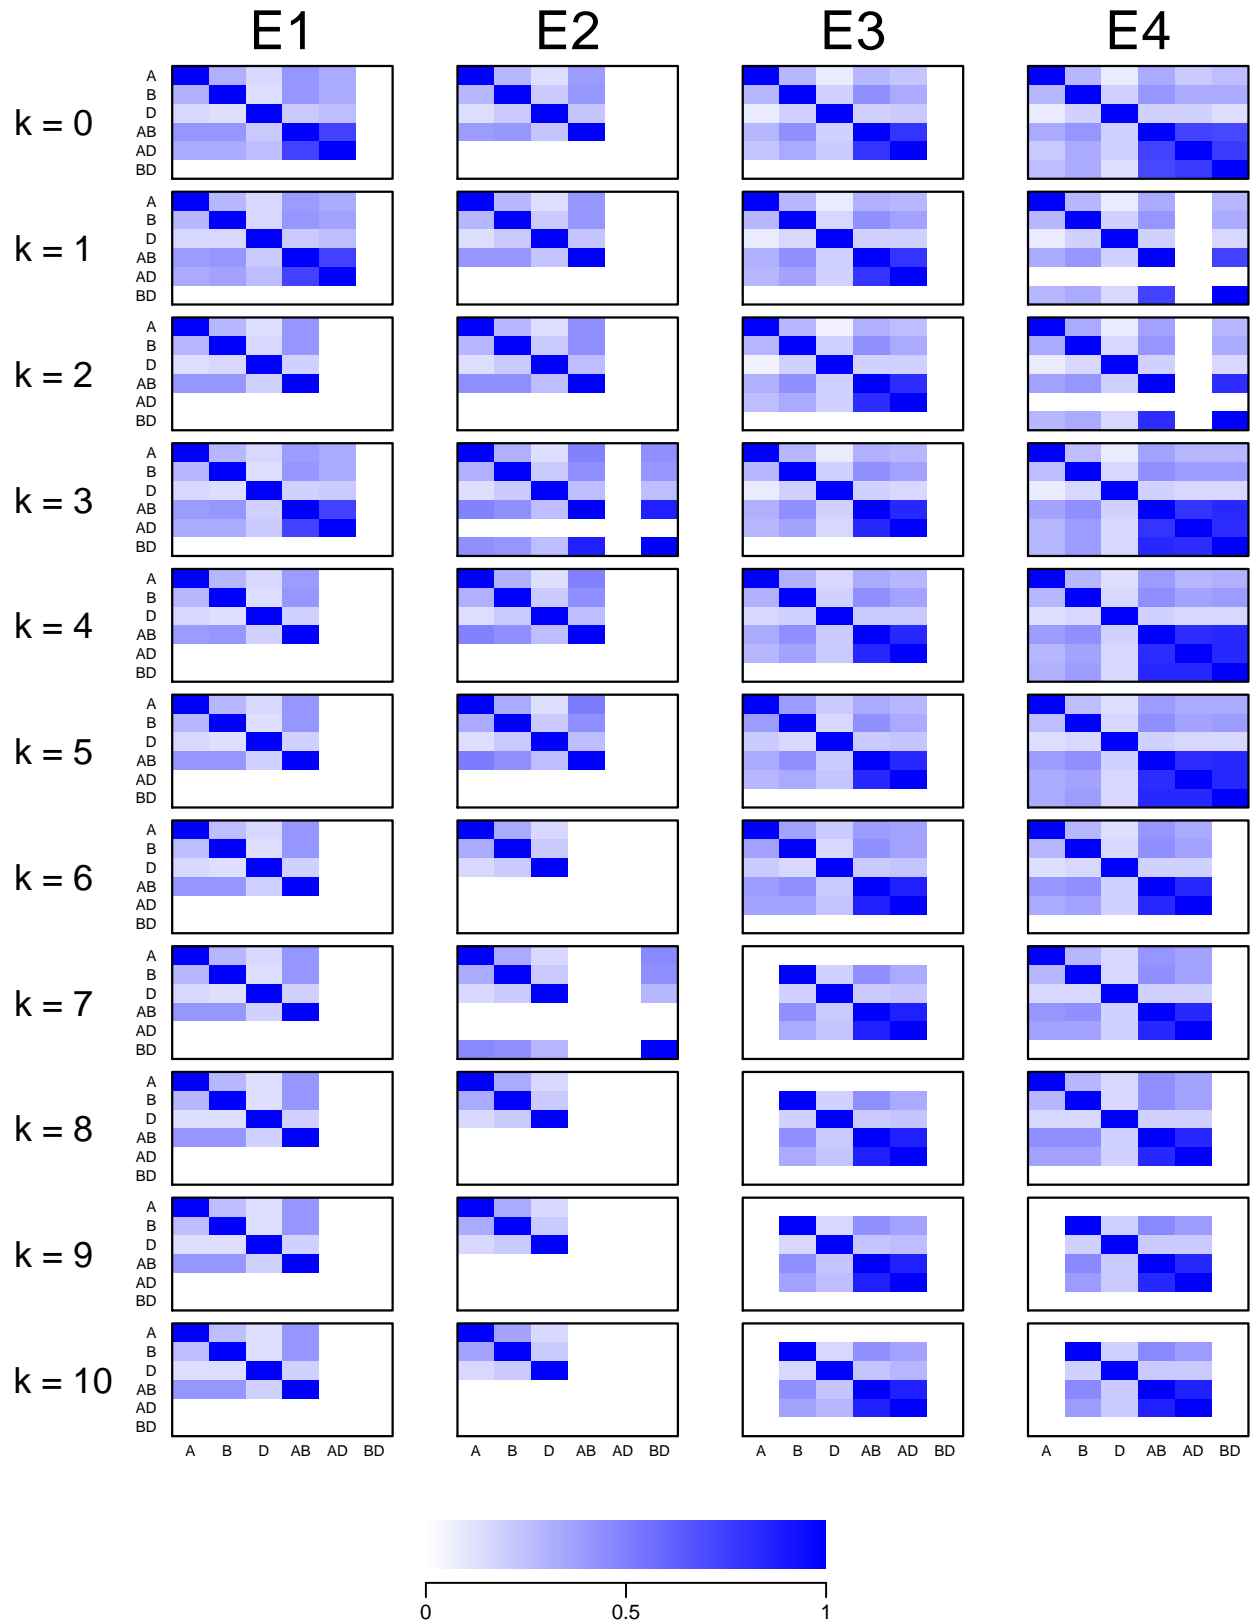

**Figure S9** Correlation of variance component estimates derived from the average information from the model fit for models correcting for population structure with  $k \in \{0, 1, \dots, 10\}$  principal components for four traits in the W-GY population.
